# Supplementary material for: A Regional Survey on Merkel Cell Carcinoma: A Plea for Uniform Patient Journey Modeling and Diagnostic–Therapeutic Pathway
Source: MDPI journal article supplement (doi:10.3390/curroncol29100570), 2022-09-30
Supplement: s1 [file s1]

**Table S1. Questionnaire items with answers of 100 General Medicine doctors, expressed as percentages**

|                                                                                                                          |    |
|--------------------------------------------------------------------------------------------------------------------------|----|
| Q1. Working position                                                                                                     | %  |
| a) Primary care doctor                                                                                                   | 39 |
| b) Training physician in general medicine                                                                                | 66 |
| Q2. How old are you?                                                                                                     |    |
| a. <30 y                                                                                                                 | 16 |
| b. 30-40                                                                                                                 | 29 |
| c. 41-50                                                                                                                 | 20 |
| d. 51-60                                                                                                                 | 18 |
| e. >60                                                                                                                   | 17 |
| Q3. Which local area do you refer to?                                                                                    |    |
| a. Roma1                                                                                                                 | 35 |
| b. Roma2                                                                                                                 | 26 |
| c. Roma3                                                                                                                 | 39 |
| d. Latina/Frosinone                                                                                                      | 0  |
| Q4. In which province of Lazio do you work?                                                                              |    |
| a. Roma                                                                                                                  | 95 |
| b. Latina                                                                                                                | 0  |
| c. Frosinone                                                                                                             | 0  |
| d. Viterbo                                                                                                               | 3  |
| e. Rieti                                                                                                                 | 2  |
| Q5. Do you have a medical residency?                                                                                     |    |
| a. Yes                                                                                                                   | 39 |
| b. Not                                                                                                                   | 66 |
| Q6. How much do you consider your knowledge on skin tumors is adequate ? (range 0-10)?                                   |    |
| a. 0                                                                                                                     | 0  |
| b. 1                                                                                                                     | 8  |
| c. 2                                                                                                                     | 10 |
| d. 3                                                                                                                     | 20 |
| e. 4                                                                                                                     | 7  |
| f. 5                                                                                                                     | 22 |
| g. 6                                                                                                                     | 17 |
| h. 7                                                                                                                     | 5  |
| i. 8                                                                                                                     | 8  |
| j. 9                                                                                                                     | 2  |
| k. 10                                                                                                                    | 3  |
| Q7. Do you know Merkel Cell Carcinoma (MCC)?                                                                             |    |
| a. Yes                                                                                                                   | 58 |
| b. Not                                                                                                                   | 42 |
| Q8. How much do you consider yourself updated on MCC?                                                                    |    |
| a) 0                                                                                                                     | 13 |
| b) 1                                                                                                                     | 23 |
| c) 2                                                                                                                     | 20 |
| d) 3                                                                                                                     | 15 |
| e) 4                                                                                                                     | 10 |
| f) 5                                                                                                                     | 12 |
| g) 6                                                                                                                     | 3  |
| h) 7                                                                                                                     | 3  |
| i) 8                                                                                                                     | 0  |
| j) 9                                                                                                                     | 0  |
| k) 10                                                                                                                    | 0  |
| Q9. How much importance would you give to a specific training about rare skin tumors in your everyday clinical practice? |    |
| a. 0                                                                                                                     | 0  |
| b. 1                                                                                                                     | 0  |

|                                                                                                                                     |                                                 |
|-------------------------------------------------------------------------------------------------------------------------------------|-------------------------------------------------|
| c. 2                                                                                                                                | 3                                               |
| d. 3                                                                                                                                | 5                                               |
| e. 4                                                                                                                                | 5                                               |
| f. 5                                                                                                                                | 10                                              |
| g. 6                                                                                                                                | 9                                               |
| h. 7                                                                                                                                | 17                                              |
| i. 8                                                                                                                                | 16                                              |
| j. 9                                                                                                                                | 13                                              |
| k. 10                                                                                                                               | 22                                              |
| Q10. How much importance would you give to a continuous update about the diagnostic and therapeutic pathway of MCC in Lazio region? |                                                 |
| a. 0                                                                                                                                | 0                                               |
| b. 1                                                                                                                                | 0                                               |
| c. 2                                                                                                                                | 5                                               |
| d. 3                                                                                                                                | 2                                               |
| e. 4                                                                                                                                | 5                                               |
| f. 5                                                                                                                                | 10                                              |
| g. 6                                                                                                                                | 7                                               |
| h. 7                                                                                                                                | 13                                              |
| i. 8                                                                                                                                | 15                                              |
| j. 9                                                                                                                                | 13                                              |
| k. 10                                                                                                                               | 30                                              |
| Q11. Are you aware of specialized centers in your region for the management of skin cancers??                                       |                                                 |
| a. Yes                                                                                                                              | 55 (IFO 51%, IDI 41%, Policlinico Umberto I 6%) |
| b. Not                                                                                                                              | 45                                              |
| Q12. With regard to a skin lesion which are the elements that lead you to suspect a MCC diagnosis? (allowed multiple choices)       |                                                 |
| a. Any lesion that increases volume over time                                                                                       | 5                                               |
| b. A rapidly growing skin lesion                                                                                                    | 24                                              |
| c. A skin lesion that increases in volume, in photo-exposed areas                                                                   | 31                                              |
| d. A skin lesion that grows rapidly and becomes symptomatic (itching, pain, bleeding)                                               | 18                                              |
| e. A hard, gray-violet lesion on areas that are exposed in an elderly person                                                        | 22                                              |
| f. A duragree-violacelesion on areas that are chronically exposed (in an elderly person and/or)                                     | 40                                              |
| g. I don't know                                                                                                                     | 20                                              |
| Q13. In the suspicion of a MCC, what is your orientation for the eventual removal?                                                  |                                                 |
| a. I always perform/I do a biopsy before the removal                                                                                | 7                                               |
| b. Take-out/Take-out of the lesion keeping minimal margins                                                                          | 2                                               |
| c. Take away/I do take away of the lesion enlarging the margin and awaiting histology before making a flap                          | 14                                              |
| d. Take away/ I do take away of the lesion widening margins and doing immediately unlembo                                           | 3                                               |
| e. I leave the patient to other Specialist/Centre                                                                                   | 74                                              |
| Q14. Are you able to manage personally any side effects of cancer treatments in your patients with malignant skin tumors?           |                                                 |
| a. Yes                                                                                                                              | 7                                               |

|                                                                                                                            |    |
|----------------------------------------------------------------------------------------------------------------------------|----|
| b. Yes, with some difficulty                                                                                               | 25 |
| c. Not                                                                                                                     | 66 |
| d. I don't know                                                                                                            | 2  |
| Q15. Do you know who to turn to, in case of side effects to oncological treatments in your patients with skin tumors?      |    |
| a. Yes                                                                                                                     | 39 |
| b. Not                                                                                                                     | 61 |
| Q16. If necessary, do you have any possibility of a direct contact with the specialist reference center?                   |    |
| a. Yes                                                                                                                     | 14 |
| b. Not                                                                                                                     | 81 |
| c. I don't know                                                                                                            | 5  |
| Q17. In the area where you work, are there defined paths of palliative care for cancer patients in advanced stage disease? |    |
| a. Yes, there is an efficient palliative care network                                                                      | 49 |
| b. Not                                                                                                                     | 15 |
| c. Yes, but only hospice center                                                                                            | 18 |
| d. Yes, but only home palliative care                                                                                      | 5  |
| e. I don't know                                                                                                            |    |

**Table S2. Questionnaire items with answers of specialized physicians involved in cutaneous tumor management, expressed as percentages**

|                                                                                                                          | Oncologist (N= 72) | Dermatologist (N= 87) | Surgeon (N= 59) |
|--------------------------------------------------------------------------------------------------------------------------|--------------------|-----------------------|-----------------|
| Q1. How old are you?                                                                                                     |                    |                       |                 |
| f. <30                                                                                                                   | 6                  | 0                     | 7               |
| g. 30-40                                                                                                                 | 19                 | 43                    | 7               |
| h. 41-50                                                                                                                 | 28                 | 43                    | 13              |
| i. 51-60                                                                                                                 | 28                 | 7                     | 53              |
| j. >60                                                                                                                   | 19                 | 7                     | 20              |
| Q2. In which province of Lazio do you work?                                                                              |                    |                       |                 |
| f. Roma                                                                                                                  |                    | 93                    |                 |
| g. Latina                                                                                                                |                    | 2                     |                 |
| h. Frosinone                                                                                                             |                    | 2                     |                 |
| i. Viterbo                                                                                                               |                    | 2                     |                 |
| j. Rieti                                                                                                                 |                    | 0                     |                 |
| Q3. How much do you consider yourself updated on MCC? (range 0-10)?                                                      |                    |                       |                 |
| l. 0                                                                                                                     | 0                  | 0                     | 0               |
| m. 1                                                                                                                     | 13                 | 0                     | 0               |
| n. 2                                                                                                                     | 6                  | 0                     | 0               |
| o. 3                                                                                                                     | 0                  | 7                     | 0               |
| p. 4                                                                                                                     | 6                  | 21                    | 0               |
| q. 5                                                                                                                     | 6                  | 7                     | 13              |
| r. 6                                                                                                                     | 19                 | 14                    | 7               |
| s. 7                                                                                                                     | 6                  | 7                     | 7               |
| t. 8                                                                                                                     | 25                 | 21                    | 27              |
| u. 9                                                                                                                     | 6                  | 21                    | 20              |
| v. 10                                                                                                                    | 13                 | 0                     | 27              |
| Q4. How much importance would you give to a specific training about rare skin tumors in your everyday clinical practice? |                    |                       |                 |
| l) 0                                                                                                                     | 0                  | 0                     | 0               |
| m) 1                                                                                                                     | 0                  | 0                     | 7               |
| n) 2                                                                                                                     | 0                  | 0                     | 0               |
| o) 3                                                                                                                     | 0                  | 0                     | 7               |

|                                                                                                                                                                    |                |                |                |
|--------------------------------------------------------------------------------------------------------------------------------------------------------------------|----------------|----------------|----------------|
| p) 4                                                                                                                                                               | 0              | 0              | 13             |
| q) 5                                                                                                                                                               | 13             | 7              | 13             |
| r) 6                                                                                                                                                               | 25             | 29             | 7              |
| s) 7                                                                                                                                                               | 13             | 21             | 7              |
| t) 8                                                                                                                                                               | 25             | 21             | 13             |
| u) 9                                                                                                                                                               | 13             | 7              | 7              |
| v) 10                                                                                                                                                              | 13             | 14             | 27             |
| Q5. How much importance would you give to a continuous update about the diagnostic and therapeutic pathway of MCC in Lazio region?                                 |                |                |                |
| l. 0                                                                                                                                                               | 0              | 0              | 0              |
| m. 1                                                                                                                                                               | 0              | 0              | 0              |
| n. 2                                                                                                                                                               | 0              | 0              | 0              |
| o. 3                                                                                                                                                               | 0              | 0              | 0              |
| p. 4                                                                                                                                                               | 6              | 7              | 0              |
| q. 5                                                                                                                                                               | 0              | 7              | 7              |
| r. 6                                                                                                                                                               | 19             | 7              | 7              |
| s. 7                                                                                                                                                               | 13             | 7              | 0              |
| t. 8                                                                                                                                                               | 19             | 21             | 33             |
| u. 9                                                                                                                                                               | 19             | 21             | 20             |
| v. 10                                                                                                                                                              | 25             | 29             | 33             |
| Q6. In the center where you work, how many Merkel cell carcinoma are averagely diagnosed in a year?                                                                |                |                |                |
| l. 1 case                                                                                                                                                          | 44             | 36             | 13             |
| m. Up to 3 cases                                                                                                                                                   | 31             | 14             | 27             |
| n. Up to 5 cases                                                                                                                                                   | 19             | 36             | 27             |
| o. More than to 5 cases                                                                                                                                            | 6              | 7              | 20             |
| p. No cases                                                                                                                                                        | 0              | 7              | 13             |
| q. I don't know                                                                                                                                                    | 0              | 0              | 0              |
| Q7. In your Center, is there a multidisciplinary evaluation for MCC?                                                                                               |                |                |                |
| a. Yes, there is a dedicated multidisciplinary team                                                                                                                |                |                |                |
| b. There isn't a multidisciplinary team, but there is an ad-hoc consulting                                                                                         | 50<br>31<br>19 | 14<br>50<br>36 | 27<br>40<br>33 |
| c. No, after the visit the patient is referred to another center                                                                                                   |                |                |                |
| Q8. If there is the possibility of a multidisciplinary team evaluation, which specialists are involved in the process? (it's possible to flag all options)         |                |                |                |
| a. Dermatologists                                                                                                                                                  |                | 17             |                |
| b. Plastic surgeons                                                                                                                                                |                | 16             |                |
| c. Anatomopathologists                                                                                                                                             |                | 17             |                |
| d. Medical oncologists                                                                                                                                             |                | 16             |                |
| e. Radiation therapists                                                                                                                                            |                | 12             |                |
| f. Nuclear medicine physician                                                                                                                                      |                | 9              |                |
| g. Pharmacists                                                                                                                                                     |                | 4              |                |
| h. General practitioners                                                                                                                                           |                | 1              |                |
| i. Case manager                                                                                                                                                    |                | 4              |                |
| j. Psychologists                                                                                                                                                   |                | 4              |                |
| k. Palliative care doctors                                                                                                                                         |                | 1              |                |
| Q9. Would it be necessary for you/your center to add a telemedicine platform to your multidisciplinary team to improve the management of MCC patients who agree to |                |                |                |

|                                                                                                                                                                                                                                      |    |    |    |
|--------------------------------------------------------------------------------------------------------------------------------------------------------------------------------------------------------------------------------------|----|----|----|
| consult other specialists or specialized teams with an important experience on MCC?                                                                                                                                                  |    |    |    |
| a. Yes, always                                                                                                                                                                                                                       | 47 |    |    |
| b. Yes, only for complex selected cases                                                                                                                                                                                              | 38 |    |    |
| c. No, the resources are available only in presence                                                                                                                                                                                  | 11 |    |    |
| d. No, I don't consider it necessary                                                                                                                                                                                                 | 9  |    |    |
| Q10. According to your knowledge and/or your experience, which patients do you consider at risk to have an MCC? (multiple answers are allowed, up to 3 answers. The numbers refer to the percentage of answers given to all answers) |    |    |    |
| a. I don't know                                                                                                                                                                                                                      | 13 | 0  | 4  |
| b. Subjects with sun-damaged skin and high sun exposure                                                                                                                                                                              | 25 | 21 | 15 |
| c. Poliomavirus virus positive subjects (MCPyV)                                                                                                                                                                                      | 44 | 50 | 19 |
| d. Genetic predisposition                                                                                                                                                                                                            | 0  | 0  | 0  |
| e. Young aged subjects                                                                                                                                                                                                               | 0  | 7  | 2  |
| f. Mainly subjects aged > a 50 years old                                                                                                                                                                                             | 56 | 79 | 20 |
| g. Immunocompromised patients                                                                                                                                                                                                        | 44 | 64 | 26 |
| h. Dark skinned subjects                                                                                                                                                                                                             | 0  | 0  | 0  |
| i. Bright skinned subjects                                                                                                                                                                                                           | 0  | 57 | 15 |
| Q11. Which are the main three elements of a skin lesion which make you doubt of an MCC? (up to 3 answers allowed)                                                                                                                    |    |    |    |
| a. I don't know                                                                                                                                                                                                                      |    | 0  | 0  |
| b. A grey-violet lesion in exposed areas of the body (elderly and/or chronically immunocompromised patients)                                                                                                                         |    | 23 | 33 |
| c. A grey-violet lesion in sun-exposed areas of the body of an elderly patient                                                                                                                                                       |    | 20 | 7  |
| d. A skin lesion that grows rapidly and becomes symptomatic (itchy, painful, bleeding)                                                                                                                                               |    | 13 | 22 |
| e. A growing skin lesion in sun-exposed areas of the body                                                                                                                                                                            |    | 27 | 4  |
| f. A skin lesion that grows rapidly                                                                                                                                                                                                  |    | 13 | 30 |
| g. Any skin lesion that grows in time                                                                                                                                                                                                |    | 3  | 46 |
| Q12. Dermatoscopy in suspected MCC? (multiple answers allowed)                                                                                                                                                                       |    |    |    |
| a. It's not a suggested diagnostic tool                                                                                                                                                                                              |    | 0  |    |
| b. In selected cases it could be useful for differential diagnosis                                                                                                                                                                   |    | 64 |    |
| c. It's always a fundamental diagnostic tool                                                                                                                                                                                         |    | 36 |    |
| Q13. In a suspected MCC, which decision do you make about its removal?                                                                                                                                                               |    |    |    |
| a. I refer the patient to a specialist or to a specialized center                                                                                                                                                                    |    | 29 | 7  |
| b. I remove the lesion widening its margins and I immediately make a lembo.                                                                                                                                                          |    | 14 |    |
| c. I remove the lesion widening its margins and I wait for the histological results before making a lembo                                                                                                                            |    | 50 | 60 |
|                                                                                                                                                                                                                                      |    | 7  |    |

|                                                                                                                                                                   |          |    |    |
|-------------------------------------------------------------------------------------------------------------------------------------------------------------------|----------|----|----|
| d. I remove the lesion maintaining minimal margins                                                                                                                |          |    | 33 |
| e. I always perform a biopsy before the removal                                                                                                                   |          |    |    |
| Q14. The complete surgical removal of an MCC is usually performed:                                                                                                |          |    |    |
| a. In a primitive lesion                                                                                                                                          |          | 57 | 20 |
| b. After an incisional biopsy                                                                                                                                     |          | 21 | 27 |
| c. After an excisional biopsy                                                                                                                                     |          | 21 | 53 |
| d. After a wide excisional biopsy                                                                                                                                 |          |    |    |
| e. I refer the patient to another center                                                                                                                          |          |    |    |
| Q15. Which width is recommended for the excision margins? (perilesional or around to the primitive lesion or to the scar), in case of previous excisional biopsy? |          |    |    |
| a. 1 cm                                                                                                                                                           |          | 43 | 13 |
| b. 2 cm                                                                                                                                                           |          | 29 | 53 |
| c. 3 cm                                                                                                                                                           |          | 28 | 34 |
| Q16. In case of a histological diagnosis of an MCC do you recommend the sentinel lymph node biopsy?                                                               |          |    |    |
| a. Yes                                                                                                                                                            | 100      | 86 | 80 |
| b. No                                                                                                                                                             | 0        | 14 | 20 |
| Q17. If present, which ones do you consider as risk factors? (multiple answers, all choices possible)                                                             |          |    |    |
| a. T>2cm                                                                                                                                                          | 69       | 64 | 80 |
| b. Chronic immunocompromised state, transplant, HIV, CLL                                                                                                          | 44       | 64 | 80 |
| c. Head-neck localization                                                                                                                                         | 31       | 57 | 60 |
| d. Lymphovascular invasion                                                                                                                                        | 44       | 57 | 80 |
| Q18. Which instrumental exams do you consider necessary for the staging of the disease? (multiple answers)                                                        |          |    |    |
| a. I refer the patient to a specialized center                                                                                                                    |          | 13 | 40 |
| b. Total body FDG-PET scan + contrast brain CT/NMR only if di T> 2 cm (T2) or positive lymph nodes                                                                | 19<br>13 | 13 | 33 |
| c. Contrast total body CT only if T > 2 cm (T2) or positive lymph nodes                                                                                           | 6        | 3  | 0  |
| d. Total body FDG-PET+ brain contrast CT/NMR                                                                                                                      | 25       | 13 | 33 |
| e. Contrast total body CT                                                                                                                                         | 25       | 29 | 13 |
| f. Only loco-regional lymph nodes ultrasound                                                                                                                      | 0        | 0  | 0  |
| g. Pelvic-abdominal and lymph nodes ultrasound                                                                                                                    | 6        | 26 | 27 |
| h. Chest X-ray                                                                                                                                                    | 6        | 3  | 13 |
| Q19. In which patients do you consider immunotherapy less indicated? (multiple answers allowed )                                                                  |          |    |    |
| a. Non-symptomatic HIV patients in antiretroviral therapy                                                                                                         | 6        |    |    |
| b. AIDS patients                                                                                                                                                  | 19       |    |    |
| c. Transplanted patients in immunosuppressive treatment                                                                                                           | 50       |    |    |
| d. Patients with active autoimmune disease                                                                                                                        | 31       |    |    |

|                                                                                               |    |    |    |
|-----------------------------------------------------------------------------------------------|----|----|----|
| e. Patients with autoimmune disease in no immunosuppressive treatment                         | 25 |    |    |
| f. Patients with concomitant onco-hematologic disease in follow-up                            | 0  |    |    |
| g. There is no absolute contraindication to immunotherapy                                     | 50 |    |    |
| Q20. When radiotherapy is indicated as MCC treatment?                                         |    |    |    |
| a. Always, after the histological definition of the removed lesion                            | 0  | 20 | 0  |
| b. Only in the presence of risk factors related to the primitive tumor                        | 56 | 20 | 53 |
| c. Only in the presence of lymphadenopathy                                                    | 25 | 40 | 13 |
| d. It's not indicated                                                                         | 19 | 20 | 7  |
| e. I don't know                                                                               | 0  | 20 | 27 |
| Q21. About the oncological treatment of MCC, according to you? (multiple choices):            |    |    |    |
| a. Chemotherapy is indicated as first line treatment                                          | 13 | 8  | 0  |
| b. Chemotherapy is indicated only in patients unfitted to immunotherapy                       |    |    |    |
| c. Chemotherapy is indicated in metastatic disease/relapse                                    | 63 | 13 | 8  |
| d. Chemotherapy hasn't shown improvement in overall survival                                  | 0  | 8  | 19 |
| e. Chemotherapy should be carefully valuated in immunocompromised patients                    | 25 | 0  | 12 |
| f. Immunotherapy is preferred to chemotherapy in advanced stage disease                       | 13 | 4  | 8  |
| g. It's indicated in patients undergone immunotherapy who got progression disease             | 88 | 42 | 19 |
| h. I don't know                                                                               | 25 | 8  | 4  |
|                                                                                               | 0  | 17 | 31 |
| Q22. Which follow up program do you have at your centre for MCC patients?                     |    |    |    |
| a. Clinical and instrumental examinations only in suspected clinical cases                    |    |    |    |
| b. Clinical and dermatological and instrumental examinations only in suspected clinical cases | 6  | 7  | 0  |
| c. Periodical first level instrumental examinations (Chest X-ray and ultrasound)              | 13 | 7  | 13 |
| d. Periodical second level instrumental examinations (CT scan/ FDG-PET)                       | 25 | 7  | 0  |
| e. I don't know                                                                               | 56 | 14 | 47 |
| f. I refer the patient to other centres                                                       | 0  | 64 | 20 |
|                                                                                               | 0  | 0  | 20 |
| Q23. Which are the most common side effects associated to immunotherapy? (multiple answers)   |    |    |    |
| a. Fatigue                                                                                    | 63 |    |    |

|                                      |    |  |  |
|--------------------------------------|----|--|--|
| b. Decreased appetite                | 19 |  |  |
| c. Nausea, vomiting                  | 19 |  |  |
| d. Constipation, diarrhea            | 0  |  |  |
| e. Allergic reaction to the infusion | 44 |  |  |
| f. Other                             | 13 |  |  |

**Table. S3 Questionnaire items with answers (expressed as percentages) of 50 Anatomico-pathologists involved in cutaneous tumor management**

|                                                                                                                                       |    |
|---------------------------------------------------------------------------------------------------------------------------------------|----|
| Q1. How old are you?                                                                                                                  |    |
| a. <30                                                                                                                                | 6  |
| b. 30-40                                                                                                                              | 22 |
| c. 41-50                                                                                                                              | 16 |
| d. 51-60                                                                                                                              | 30 |
| e. >60                                                                                                                                | 26 |
| Q2. In which province of Lazio do you work?                                                                                           |    |
| a. Roma                                                                                                                               | 90 |
| b. Latina                                                                                                                             | 8  |
| c. Frosinone                                                                                                                          | 0  |
| d. Viterbo                                                                                                                            | 2  |
| e. Rieti                                                                                                                              | 0  |
| Q3. How much do you consider yourself updated about MCC?                                                                              |    |
| a) 0                                                                                                                                  | 0  |
| b) 1                                                                                                                                  | 6  |
| c) 2                                                                                                                                  | 6  |
| d) 3                                                                                                                                  | 8  |
| e) 4                                                                                                                                  | 22 |
| f) 5                                                                                                                                  | 18 |
| g) 6                                                                                                                                  | 14 |
| h) 7                                                                                                                                  | 10 |
| i) 8                                                                                                                                  | 6  |
| j) 9                                                                                                                                  | 8  |
| k) 10                                                                                                                                 | 2  |
| Q4. How much importance would you give to a specific training about rare skin tumors in your everyday clinical practice?              |    |
| a. 0                                                                                                                                  | 0  |
| b. 1                                                                                                                                  | 8  |
| c. 2                                                                                                                                  | 6  |
| d. 3                                                                                                                                  | 4  |
| e. 4                                                                                                                                  | 12 |
| f. 5                                                                                                                                  | 10 |
| g. 6                                                                                                                                  | 6  |
| h. 7                                                                                                                                  | 14 |
| i. 8                                                                                                                                  | 12 |
| j. 9                                                                                                                                  | 10 |
| k. 10                                                                                                                                 | 18 |
| Q5. How much importance would you give to a continuous update about the diagnostic and therapeutic management of MCC in Lazio region? |    |
| a. 0                                                                                                                                  | 0  |
| b. 1                                                                                                                                  | 6  |
| c. 2                                                                                                                                  | 6  |
| d. 3                                                                                                                                  | 0  |
| e. 4                                                                                                                                  | 10 |



|                                                                                                                                                                                                                                                        |    |
|--------------------------------------------------------------------------------------------------------------------------------------------------------------------------------------------------------------------------------------------------------|----|
| f. 5                                                                                                                                                                                                                                                   | 4  |
| g. 6                                                                                                                                                                                                                                                   | 10 |
| h. 7                                                                                                                                                                                                                                                   | 10 |
| i. 8                                                                                                                                                                                                                                                   | 12 |
| j. 9                                                                                                                                                                                                                                                   | 16 |
| k. 10                                                                                                                                                                                                                                                  | 26 |
| Q6. In the center where you work, how many Merkel cell carcinoma patients are averagely diagnosed in a year?                                                                                                                                           |    |
| r. 1 case                                                                                                                                                                                                                                              | 22 |
| s. Up to 3 cases                                                                                                                                                                                                                                       | 22 |
| t. Up to 5 cases                                                                                                                                                                                                                                       | 16 |
| u. More than 5 cases                                                                                                                                                                                                                                   | 14 |
| v. No cases                                                                                                                                                                                                                                            | 10 |
| w. I don't know                                                                                                                                                                                                                                        | 16 |
| Q7. In your Center, is it planned a multidisciplinary evaluation for MCC?                                                                                                                                                                              |    |
| d. Yes, there is a multidisciplinary defined team                                                                                                                                                                                                      | 13 |
| e. There is not a defined MDT team but specialized consultation may be requested                                                                                                                                                                       | 54 |
| f. No, the patient was referred to another center                                                                                                                                                                                                      | 33 |
| Q8. If there is the possibility of a multidisciplinary team valuation, which specialists are involved in the process? (it's possible to flag all options)                                                                                              |    |
| a. Dermatologists                                                                                                                                                                                                                                      | 74 |
| b. Plastic surgeons                                                                                                                                                                                                                                    | 62 |
| c. Anatomopathologists                                                                                                                                                                                                                                 | 76 |
| d. Medical oncologists                                                                                                                                                                                                                                 | 60 |
| e. Radiation therapists                                                                                                                                                                                                                                | 30 |
| f. Nuclear medicine physician                                                                                                                                                                                                                          | 14 |
| g. Pharmacists                                                                                                                                                                                                                                         | 6  |
| h. General practitioners                                                                                                                                                                                                                               | 2  |
| i. Case manager                                                                                                                                                                                                                                        | 8  |
| j. Psychologists                                                                                                                                                                                                                                       | 10 |
| k. Palliative care doctors                                                                                                                                                                                                                             | 2  |
| l. Other                                                                                                                                                                                                                                               | 10 |
| Q9. Would it be necessary for you/your center to add a telemedicine platform to your multidisciplinary team to improve the management of MCC patients who agree to consult other specialists or specialized teams with an important experience on MCC? |    |
| a) Yes, always                                                                                                                                                                                                                                         | 58 |
| b) Yes, only for complex selected cases                                                                                                                                                                                                                | 20 |
| c) No, the resources are available only in presence                                                                                                                                                                                                    | 8  |
| d) No, I don't consider it necessary                                                                                                                                                                                                                   | 14 |
| Q10. Do you think that a specialist is important for the histological diagnosis of MCC?                                                                                                                                                                |    |
| a. Yes                                                                                                                                                                                                                                                 | 44 |
| b. No                                                                                                                                                                                                                                                  | 50 |
| c. Only in specific complex cases (Atypical forms or deviant immunophenotype, abnormal localization, atypical morphology, rare phenotype, combinant forms)                                                                                             | 6  |
| Q11. How often do you refer to a specialist a suspect case of MCC?                                                                                                                                                                                     |    |
| a. Never                                                                                                                                                                                                                                               | 38 |
| b. Always                                                                                                                                                                                                                                              | 28 |
| c. Almost 25% of cases                                                                                                                                                                                                                                 | 20 |

|                                                                                                                                                                      |    |
|----------------------------------------------------------------------------------------------------------------------------------------------------------------------|----|
| d. Almost 50% of cases                                                                                                                                               | 6  |
| e. Almost 75% of cases                                                                                                                                               | 4  |
| f. Other                                                                                                                                                             | 4  |
| Q12. Has it ever happened to you that after diagnosing an MCC, the examined material was requested for further evaluation from other specialists?                    |    |
| a. Never                                                                                                                                                             | 48 |
| b. Always                                                                                                                                                            | 8  |
| c. Almost 25% of cases                                                                                                                                               | 26 |
| d. Almost 50% of cases                                                                                                                                               | 12 |
| e. Almost 75% of cases                                                                                                                                               | 2  |
| f. Other                                                                                                                                                             | 6  |
| Q13. How often has occurred that even in a certain MCC histological diagnosis at your work centre, the research of MPCyV in the histological material was performed? |    |
| a. Never                                                                                                                                                             | 68 |
| b. Always                                                                                                                                                            | 10 |
| c. Almost 25% of cases                                                                                                                                               | 10 |
| d. Almost 50% of cases                                                                                                                                               | 0  |
| e. Almost 75% of cases                                                                                                                                               | 2  |
| f. Other                                                                                                                                                             | 10 |
